# Supplementary material
Source: Research Square preprint supplement (doi:10.21203/rs.3.rs-9107770/v1)
Supplement: Supplementary file 1 [file 63235541f7a9973b64a3f6b7.docx]

# Electrode Coverage and Responsiveness by Brain Region

| **Region** | **Subjects** | **PEA Beta** | **CO2 Beta** | **PEA&CO2 Beta** | **PEA Theta** | **CO2 Theta** | **PEA&CO2 Theta** | **PEA Gamma** | **CO2 Gamma** | **PEA&CO2 Gamma** |
| --- | --- | --- | --- | --- | --- | --- | --- | --- | --- | --- |
| Hippocampus | 9 | 2 (1) | 12 (4) | 0 (0) | 16 (4) | 10 (4) | 0 (0) | 6 (3) | 12 (4) | 0 (0) |
| Area_STSv_anterior | 9 | 0 (0) | 6 (2) | 2 (1) | 4 (2) | 10 (4) | 0 (0) | 0 (0) | 2 (1) | 0 (0) |
| Amygdala | 9 | 8 (2) | 12 (3) | 4 (1) | 10 (3) | 8 (4) | 0 (0) | 4 (1) | 2 (1) | 14 (1) |
| Putamen | 7 | 2 (1) | 8 (3) | 2 (1) | 0 (0) | 8 (4) | 2 (1) | 4 (1) | 6 (2) | 2 (1) |
| Anterior_Ventral_Insular_Area | 7 | 0 (0) | 10 (2) | 0 (0) | 4 (1) | 2 (1) | 0 (0) | 6 (2) | 8 (1) | 0 (0) |
| Area_Posterior_Insular_1 | 9 | 0 (0) | 2 (1) | 2 (1) | 6 (2) | 4 (2) | 2 (1) | 0 (0) | 6 (2) | 4 (1) |
| Area_TE2_posterior | 8 | 2 (1) | 2 (1) | 2 (1) | 6 (2) | 2 (1) | 4 (1) | 8 (1) | 4 (2) | 2 (1) |
| Posterior_OFC_Complex | 7 | 2 (1) | 0 (0) | 0 (0) | 2 (1) | 2 (1) | 0 (0) | 4 (2) | 0 (0) | 0 (0) |
| Area_TE1_Middle | 9 | 0 (0) | 6 (2) | 0 (0) | 2 (1) | 0 (0) | 0 (0) | 2 (1) | 0 (0) | 0 (0) |
| Area_TE1_anterior | 8 | 2 (1) | 0 (0) | 0 (0) | 2 (1) | 8 (2) | 0 (0) | 0 (0) | 0 (0) | 0 (0) |
| Area_TE1_posterior | 8 | 2 (1) | 0 (0) | 0 (0) | 2 (1) | 4 (2) | 0 (0) | 0 (0) | 0 (0) | 0 (0) |
| Area_TF | 8 | 2 (1) | 6 (2) | 0 (0) | 4 (2) | 6 (2) | 0 (0) | 0 (0) | 0 (0) | 0 (0) |
| Area_TA2 | 7 | 2 (1) | 4 (2) | 0 (0) | 2 (1) | 2 (1) | 0 (0) | 0 (0) | 2 (1) | 4 (1) |
| Caudate | 5 | 0 (0) | 4 (1) | 0 (0) | 0 (0) | 2 (2) | 0 (0) | 4 (1) | 6 (3) | 0 (0) |
| Area_TE2_anterior | 6 | 0 (0) | 0 (0) | 0 (0) | 0 (0) | 2 (1) | 0 (0) | 0 (0) | 0 (0) | 0 (0) |
| Pirform_Cortex | 7 | 2 (1) | 2 (1) | 2 (1) | 10 (2) | 4 (2) | 2 (1) | 4 (2) | 2 (1) | 2 (1) |
| Area_TG_dorsal | 2 | 6 (2) | 2 (1) | 0 (0) | 18 (1) | 0 (0) | 2 (1) | 0 (0) | 6 (1) | 0 (0) |
| Medial_Belt_Complex | 8 | 2 (1) | 0 (0) | 0 (0) | 2 (1) | 0 (0) | 2 (1) | 0 (0) | 0 (1) | 0 (0) |
| Posterior_Insular_Area_2 | 7 | 2 (1) | 2 (1) | 0 (0) | 6 (3) | 6 (2) | 0 (0) | 2 (1) | 4 (2) | 2 (1) |
| Area_47m | 6 | 2 (1) | 0 (0) | 0 (0) | 0 (0) | 2 (2) | 0 (0) | 8 (3) | 0 (0) | 0 (0) |
|  | 6 | 0 (0) | 0 (0) | 0 (0) | 0 (0) | 2 (1) | 0 (0) | 0 (0) | 0 (0) | 4 (2) |
| Area_13l | 4 | 2 (1) | 0 (0) | 0 (0) | 2 (1) | 0 (1) | 0 (0) | 4 (1) | 2 (1) | 0 (0) |
| Auditory_5_Complex | 6 | 2 (1) | 0 (0) | 0 (0) | 2 (1) | 2 (1) | 0 (0) | 0 (0) | 0 (0) | 0 (0) |
| ParaBelt_Complex | 5 | 2 (1) | 0 (0) | 0 (0) | 2 (1) | 2 (1) | 0 (0) | 0 (0) | 0 (0) | 0 (0) |
| ParaHippocampal_Area_3 | 5 | 4 (1) | 0 (0) | 0 (0) | 4 (2) | 0 (0) | 2 (1) | 2 (1) | 0 (0) | 0 (0) |
| Thal_Ventral_Lateral_Anterior | 5 | 0 (0) | 0 (0) | 0 (0) | 0 (0) | 0 (0) | 0 (0) | 2 (1) | 2 (1) | 0 (0) |
| Area_45 | 4 | 0 (0) | 0 (0) | 0 (0) | 0 (0) | 4 (1) | 0 (0) | 0 (0) | 0 (0) | 0 (0) |
| Area_Frontal_Opercular_5 | 5 | 2 (1) | 0 (0) | 0 (0) | 2 (1) | 0 (0) | 0 (0) | 0 (0) | 0 (0) | 0 (0) |
| posterior_OFC_Complex | 4 | 0 (0) | 0 (0) | 0 (0) | 0 (0) | 0 (0) | 0 (0) | 0 (0) | 4 (1) | 0 (0) |
| Area_OP2-3-VS | 4 | 0 (0) | 0 (0) | 0 (0) | 0 (0) | 2 (1) | 0 (0) | 0 (0) | 0 (0) | 0 (0) |
| Thal_Ventral_posterolateral | 3 | 0 (0) | 4 (1) | 0 (0) | 2 (1) | 0 (0) | 0 (0) | 2 (1) | 0 (0) | 0 (0) |
| Area_23c | 3 | 0 (0) | 0 (0) | 0 (0) | 0 (0) | 0 (0) | 0 (0) | 0 (0) | 8 (2) | 0 (0) |
| Area_47l_(47_lateral) | 6 | 0 (0) | 0 (0) | 0 (0) | 2 (1) | 0 (0) | 0 (0) | 0 (0) | 6 (1) | 0 (0) |
| Area_STGa | 3 | 2 (1) | 2 (1) | 0 (0) | 0 (0) | 0 (0) | 0 (0) | 2 (1) | 0 (0) | 0 (0) |
| PreSubiculum | 7 | 6 (3) | 0 (0) | 0 (0) | 0 (0) | 0 (0) | 0 (0) | 0 (0) | 0 (0) | 0 (0) |
| Area_posterior_24 | 3 | 0 (0) | 0 (0) | 0 (0) | 0 (0) | 2 (1) | 0 (0) | 0 (0) | 0 (0) | 0 (0) |
| Middle_Insular_Area | 4 | 0 (0) | 2 (1) | 0 (0) | 0 (0) | 0 (0) | 0 (0) | 4 (2) | 4 (1) | 0 (0) |
| RetroSplenial_Complex | 3 | 0 (0) | 0 (0) | 0 (0) | 0 (0) | 0 (0) | 0 (0) | 2 (1) | 2 (1) | 0 (0) |
| VentroMedial_Visual_Area_2 | 6 | 2 (1) | 0 (0) | 0 (0) | 0 (0) | 0 (0) | 0 (0) | 0 (0) | 2 (1) | 2 (1) |
| Anterior_Agranular_Insula_Complex | 4 | 0 (0) | 2 (1) | 0 (0) | 4 (1) | 2 (1) | 2 (1) | 6 (2) | 0 (0) | 6 (2) |
| Area_posterior_47r | 5 | 0 (0) | 0 (0) | 0 (0) | 0 (0) | 0 (0) | 0 (0) | 0 (0) | 0 (1) | 0 (0) |
| Frontal_Opercular_Area_3 | 4 | 0 (0) | 0 (0) | 0 (0) | 0 (0) | 0 (0) | 0 (0) | 0 (0) | 2 (1) | 4 (1) |
| Frontal_Opercular_Area_4 | 5 | 0 (0) | 2 (1) | 0 (0) | 2 (1) | 0 (0) | 0 (0) | 0 (0) | 0 (0) | 0 (0) |
| Insular_Granular_Complex | 4 | 0 (0) | 2 (1) | 0 (0) | 0 (0) | 0 (0) | 0 (0) | 2 (1) | 2 (1) | 0 (0) |
| VentroMedial_Visual_Area_1 | 5 | 0 (0) | 0 (0) | 0 (0) | 2 (1) | 2 (1) | 0 (0) | 6 (2) | 0 (0) | 0 (0) |
| Area_3a | 3 | 0 (0) | 0 (0) | 0 (0) | 0 (0) | 0 (0) | 0 (0) | 0 (0) | 0 (0) | 0 (0) |
| Area_IFJa | 3 | 0 (0) | 0 (0) | 0 (0) | 0 (0) | 0 (0) | 0 (0) | 0 (0) | 0 (0) | 0 (0) |
| Area_OP4-PV | 3 | 0 (0) | 0 (0) | 0 (0) | 0 (0) | 0 (1) | 0 (0) | 0 (0) | 0 (0) | 0 (0) |
| Area_PH | 5 | 0 (0) | 0 (0) | 0 (0) | 0 (0) | 0 (0) | 0 (0) | 2 (1) | 0 (0) | 0 (0) |
| Area_STSv_posterior | 3 | 2 (1) | 0 (0) | 0 (0) | 0 (0) | 2 (1) | 0 (0) | 0 (0) | 0 (0) | 0 (0) |
| ParaHippocampal_Area_2 | 3 | 0 (0) | 0 (0) | 0 (0) | 0 (0) | 0 (0) | 0 (0) | 2 (1) | 0 (0) | 0 (0) |
| Second_Visual_Area | 5 | 2 (1) | 0 (0) | 0 (0) | 2 (1) | 0 (0) | 0 (0) | 4 (1) | 0 (0) | 0 (0) |
| Area_9-46d | 2 | 0 (0) | 0 (0) | 0 (0) | 0 (0) | 2 (1) | 0 (0) | 0 (0) | 0 (0) | 0 (0) |
| Area_PFcm | 4 | 0 (0) | 0 (0) | 0 (0) | 0 (0) | 0 (0) | 0 (0) | 2 (1) | 0 (1) | 0 (0) |
| Area_PFt | 2 | 0 (0) | 0 (0) | 0 (0) | 0 (0) | 0 (0) | 0 (0) | 2 (1) | 0 (1) | 0 (0) |
| Area_anterior_47r | 5 | 0 (0) | 2 (1) | 0 (0) | 0 (0) | 2 (1) | 0 (0) | 0 (0) | 0 (0) | 0 (0) |
| Auditory_4_Complex | 5 | 2 (1) | 0 (0) | 0 (0) | 2 (1) | 0 (0) | 0 (0) | 0 (0) | 0 (0) | 0 (0) |
| Rostral_Area_6 | 3 | 0 (0) | 2 (1) | 0 (0) | 2 (1) | 0 (0) | 0 (0) | 4 (1) | 0 (0) | 0 (0) |
| Anterior_IntraParietal_Area | 2 | 0 (0) | 0 (0) | 0 (0) | 0 (0) | 0 (0) | 0 (0) | 2 (1) | 0 (0) | 0 (0) |
| Area_31p_ventral | 2 | 0 (0) | 0 (0) | 0 (0) | 0 (0) | 0 (0) | 0 (0) | 0 (0) | 0 (0) | 0 (0) |
| Area_47s | 4 | 0 (0) | 0 (0) | 0 (0) | 0 (0) | 0 (0) | 0 (0) | 2 (1) | 2 (1) | 0 (0) |
| Frontal_Opercular_Area_2 | 3 | 0 (0) | 0 (0) | 0 (0) | 0 (0) | 0 (0) | 0 (0) | 0 (0) | 0 (0) | 0 (0) |
| Orbital_Frontal_Complex | 2 | 0 (0) | 2 (1) | 0 (0) | 0 (0) | 0 (0) | 0 (0) | 0 (0) | 0 (0) | 0 (0) |
| Thal_AnteroventralNucleus | 3 | 2 (1) | 0 (0) | 0 (0) | 2 (1) | 0 (0) | 0 (0) | 2 (1) | 0 (0) | 0 (0) |
| Thal_Centralmedian | 4 | 0 (0) | 0 (0) | 0 (0) | 0 (0) | 0 (0) | 0 (0) | 0 (0) | 0 (0) | 0 (0) |
| Area_25 | 3 | 0 (0) | 0 (0) | 0 (0) | 0 (0) | 0 (0) | 0 (0) | 0 (0) | 0 (0) | 0 (0) |
| Area_43 | 2 | 0 (0) | 0 (0) | 0 (0) | 0 (0) | 0 (0) | 0 (0) | 0 (0) | 0 (0) | 0 (0) |
| Area_FST | 1 | 0 (0) | 0 (0) | 0 (0) | 0 (0) | 0 (0) | 0 (0) | 2 (1) | 0 (0) | 0 (0) |
| Area_STSd_anterior | 4 | 2 (1) | 0 (0) | 0 (0) | 0 (0) | 0 (0) | 0 (0) | 0 (0) | 2 (1) | 0 (0) |
| Area_anterior_32_prime | 3 | 0 (0) | 0 (0) | 0 (0) | 0 (0) | 0 (0) | 0 (0) | 0 (0) | 0 (0) | 0 (0) |
| ParaHippocampal_Area_1 | 3 | 0 (0) | 0 (0) | 0 (0) | 0 (0) | 0 (0) | 0 (0) | 0 (0) | 0 (0) | 0 (0) |
| Thal_Ventral_Lateral_Posterior | 3 | 0 (0) | 0 (0) | 0 (0) | 0 (0) | 0 (0) | 0 (0) | 0 (0) | 0 (0) | 0 (0) |
| Area_IFSa | 4 | 2 (1) | 0 (0) | 0 (0) | 0 (0) | 0 (0) | 0 (0) | 0 (0) | 0 (0) | 0 (0) |
| Area_OP1-SII | 2 | 0 (0) | 0 (0) | 0 (0) | 0 (0) | 0 (0) | 0 (0) | 2 (1) | 0 (0) | 0 (0) |
| Area_PF_Complex | 2 | 0 (0) | 0 (0) | 0 (0) | 0 (0) | 0 (0) | 0 (0) | 0 (0) | 0 (0) | 0 (0) |
| Area_p32_prime | 2 | 0 (0) | 0 (0) | 0 (0) | 0 (0) | 0 (0) | 0 (0) | 0 (0) | 0 (0) | 0 (0) |
| Para-Insular_Area | 5 | 0 (0) | 0 (0) | 0 (0) | 2 (1) | 0 (0) | 0 (0) | 0 (0) | 0 (0) | 0 (0) |
| RetroInsular_Cortex | 2 | 0 (0) | 0 (0) | 0 (0) | 0 (0) | 0 (0) | 0 (0) | 0 (0) | 0 (0) | 0 (0) |
| Ventral_Visual_Complex | 3 | 0 (0) | 0 (0) | 0 (0) | 2 (1) | 0 (0) | 0 (0) | 0 (0) | 0 (0) | 0 (0) |
| Area_11l | 2 | 0 (0) | 0 (0) | 0 (0) | 0 (0) | 0 (0) | 0 (0) | 0 (0) | 0 (0) | 0 (0) |
| Area_23d | 2 | 0 (0) | 0 (0) | 0 (0) | 0 (0) | 2 (1) | 0 (0) | 2 (1) | 0 (0) | 0 (0) |
| Area_52 | 3 | 0 (0) | 0 (0) | 0 (0) | 0 (0) | 0 (0) | 0 (0) | 0 (0) | 0 (0) | 0 (0) |
| Area_IFSp | 2 | 0 (0) | 0 (0) | 0 (0) | 0 (0) | 4 (1) | 0 (0) | 0 (0) | 0 (0) | 0 (0) |
| Entorhinal_Cortex | 3 | 0 (0) | 0 (0) | 0 (0) | 0 (0) | 2 (1) | 0 (0) | 2 (1) | 0 (0) | 0 (0) |
| Inferior_6-8_Transitional_Area | 2 | 0 (0) | 0 (0) | 0 (0) | 2 (1) | 0 (0) | 0 (0) | 0 (0) | 2 (1) | 0 (0) |
| Perirhinal_Ectorhinal_Cortex | 3 | 0 (0) | 0 (0) | 0 (0) | 0 (0) | 0 (0) | 0 (0) | 0 (0) | 0 (0) | 0 (0) |
| Thal_Ventral_Anterior | 3 | 0 (0) | 0 (0) | 0 (0) | 0 (0) | 0 (0) | 0 (0) | 0 (0) | 2 (1) | 0 (0) |
| Area_44 | 2 | 0 (0) | 0 (0) | 0 (0) | 0 (0) | 0 (0) | 0 (0) | 2 (1) | 2 (1) | 0 (0) |
| Area_8Ad | 2 | 0 (0) | 0 (0) | 0 (0) | 0 (0) | 0 (0) | 0 (0) | 0 (0) | 0 (0) | 0 (0) |
| Area_8C | 3 | 0 (0) | 0 (0) | 0 (0) | 0 (0) | 0 (0) | 0 (0) | 0 (0) | 0 (0) | 0 (0) |
| Frontal_Opercular_Area_1 | 2 | 2 (1) | 0 (0) | 0 (0) | 0 (0) | 0 (0) | 0 (0) | 0 (0) | 0 (0) | 0 (0) |
| Lateral_Belt_Complex | 3 | 0 (0) | 0 (0) | 0 (0) | 0 (0) | 2 (1) | 0 (0) | 0 (0) | 0 (0) | 0 (0) |
| ProStriate_Area | 3 | 0 (0) | 0 (0) | 0 (0) | 0 (0) | 0 (0) | 0 (0) | 0 (0) | 0 (0) | 0 (0) |
| Superior_Temporal_Visual_Area | 1 | 2 (1) | 0 (0) | 0 (0) | 0 (0) | 0 (0) | 0 (0) | 0 (0) | 0 (0) | 0 (0) |
| Thal_Mediodorsomedial_magnocellular | 3 | 0 (0) | 0 (0) | 0 (0) | 0 (0) | 0 (0) | 0 (0) | 0 (0) | 2 (1) | 0 (0) |
| Anterior_24_prime | 1 | 0 (0) | 0 (0) | 0 (0) | 0 (0) | 0 (0) | 0 (0) | 0 (0) | 0 (0) | 0 (0) |
| Area_PHT | 1 | 0 (0) | 0 (0) | 0 (0) | 0 (0) | 0 (0) | 0 (0) | 0 (0) | 0 (0) | 0 (0) |
| Area_dorsal_23_a+b | 3 | 0 (0) | 0 (0) | 0 (0) | 0 (0) | 0 (0) | 0 (0) | 0 (0) | 0 (0) | 0 (0) |
| Area_dorsal_32 | 1 | 0 (0) | 2 (1) | 0 (0) | 0 (0) | 0 (0) | 0 (0) | 0 (0) | 0 (0) | 0 (0) |
| Fourth_Visual_Area | 1 | 2 (1) | 0 (0) | 0 (0) | 0 (0) | 0 (0) | 0 (0) | 0 (0) | 4 (1) | 0 (0) |
| Primary_Sensory_Cortex | 2 | 0 (0) | 0 (0) | 0 (0) | 0 (0) | 0 (0) | 0 (0) | 0 (0) | 0 (0) | 0 (0) |
| Primary_Visual_Cortex | 1 | 0 (0) | 0 (0) | 0 (0) | 0 (0) | 0 (0) | 0 (0) | 0 (0) | 0 (0) | 0 (0) |
| Third_Visual_Area | 1 | 2 (1) | 0 (0) | 0 (0) | 2 (1) | 0 (0) | 0 (0) | 0 (0) | 2 (1) | 0 (0) |
| Area_46 | 1 | 0 (0) | 0 (0) | 0 (0) | 0 (0) | 0 (0) | 0 (0) | 0 (0) | 0 (0) | 0 (0) |
| Area_IFJp | 1 | 0 (0) | 0 (0) | 0 (0) | 0 (0) | 0 (0) | 0 (0) | 0 (0) | 0 (0) | 0 (0) |
| Area_TemporoParietoOccipital_Junction_1 | 1 | 0 (0) | 0 (0) | 0 (0) | 0 (0) | 0 (0) | 0 (0) | 0 (0) | 0 (0) | 0 (0) |
| Globus_pallidus_externalis | 2 | 0 (0) | 0 (0) | 0 (0) | 0 (0) | 0 (0) | 0 (0) | 0 (0) | 0 (0) | 0 (0) |
| Primary_Motor_Cortex | 2 | 0 (0) | 0 (0) | 0 (0) | 0 (0) | 0 (0) | 0 (0) | 0 (0) | 0 (0) | 0 (0) |
| Thal_Mediodorsolateral_parvocellular | 2 | 0 (0) | 0 (0) | 0 (0) | 0 (0) | 0 (0) | 0 (0) | 0 (0) | 0 (0) | 0 (0) |
| Thal_Parafascicular | 2 | 0 (0) | 0 (0) | 0 (0) | 0 (0) | 0 (0) | 0 (0) | 0 (0) | 0 (0) | 0 (0) |
| Area_10v | 1 | 0 (0) | 0 (0) | 0 (0) | 0 (0) | 0 (0) | 0 (0) | 0 (0) | 0 (0) | 0 (0) |
| Area_2 | 1 | 0 (0) | 0 (0) | 0 (0) | 0 (0) | 0 (0) | 0 (0) | 0 (0) | 0 (0) | 0 (0) |
| Area_33_prime | 1 | 0 (0) | 0 (0) | 0 (0) | 0 (0) | 0 (0) | 0 (0) | 0 (0) | 0 (0) | 0 (0) |
| Area_6_anterior | 1 | 0 (0) | 0 (0) | 0 (0) | 0 (0) | 0 (0) | 0 (0) | 0 (0) | 0 (0) | 0 (0) |
| Area_Lateral_Occipital_2 | 1 | 0 (0) | 0 (0) | 0 (0) | 0 (0) | 0 (0) | 0 (0) | 0 (0) | 0 (0) | 0 (0) |
| Area_PF_Opercular | 1 | 0 (0) | 0 (0) | 0 (0) | 0 (0) | 0 (0) | 0 (0) | 0 (0) | 0 (0) | 2 (1) |
| Area_PFm_Complex | 1 | 0 (0) | 0 (0) | 0 (0) | 0 (0) | 0 (0) | 0 (0) | 0 (0) | 0 (0) | 0 (0) |
| Area_STSd_posterior | 1 | 0 (0) | 0 (0) | 0 (0) | 0 (0) | 0 (0) | 0 (0) | 0 (0) | 0 (0) | 0 (0) |
| Area_posterior_9-46v | 1 | 0 (0) | 0 (0) | 0 (0) | 2 (1) | 0 (0) | 0 (0) | 0 (0) | 0 (0) | 0 (0) |
| Fusiform_Face_Complex | 1 | 0 (0) | 0 (0) | 0 (0) | 2 (1) | 0 (0) | 0 (0) | 0 (0) | 0 (0) | 0 (0) |
| Nuclei_basal | 1 | 0 (0) | 0 (0) | 0 (0) | 0 (0) | 2 (1) | 0 (0) | 0 (0) | 0 (0) | 0 (0) |
