# Supplementary material
Source: Research Square preprint supplement (doi:10.21203/rs.3.rs-9107770/v1)
Supplement: Supplementary file 2 [file 97f4342ff074d8f40d69f3cc.docx]

# Dose-Response Sensitivity by Brain Region

| **Region** | **Subjects** | **Detected Slope⁺** | **Detected Intercept⁺** | **Not Detected Slope⁺** | **Not Detected Intercept⁺** |
| --- | --- | --- | --- | --- | --- |
| Hippocampus | 5 | 0 (0) | 11 (3) | 1 (2) | 6 (3) |
| Area_9-46d | 5 | 0 (0) | 5 (2) | 0 (0) | 2 (1) |
| Posterior_OFC_Complex | 7 | 5 (3) | 5 (3) | 2 (1) | 11 (3) |
| Area_13l | 6 | 2 (1) | 2 (1) | 0 (0) | 3 (3) |
| Amygdala | 5 | 0 (0) | 2 (2) | 1 (1) | 1 (1) |
| Anterior_Ventral_Insular_Area | 5 | 0 (0) | 1 (1) | 0 (0) | 5 (3) |
| Area_TE1_anterior | 5 | 1 (1) | 4 (2) | 1 (2) | 3 (3) |
| Area_STSv_anterior | 5 | 0 (0) | 5 (2) | 2 (3) | 4 (2) |
| Area_a24 | 4 | 2 (2) | 3 (3) | 0 (0) | 1 (1) |
| Putamen | 3 | 3 (2) | 7 (3) | 4 (2) | 7 (2) |
| Area_dorsal_32 | 5 | 0 (0) | 3 (1) | 0 (0) | 3 (2) |
| Area_STSv_posterior | 3 | 0 (0) | 1 (1) | 0 (0) | 1 (1) |
| Area_TE1_posterior | 3 | 0 (0) | 0 (0) | 2 (1) | 2 (1) |
| Area_TE2_anterior | 5 | 0 (0) | 0 (0) | 0 (0) | 1 (1) |
| Area_TE2_posterior | 3 | 0 (0) | 0 (0) | 0 (0) | 0 (0) |
| Area_47m | 5 | 1 (1) | 2 (2) | 2 (1) | 4 (1) |
| Area_STSd_posterior | 4 | 0 (0) | 3 (1) | 0 (0) | 3 (1) |
| Area_TG_dorsal | 1 | 0 (0) | 1 (1) | 0 (0) | 0 (0) |
| Area_46 | 3 | 0 (0) | 1 (1) | 0 (0) | 1 (1) |
| Area_posterior_47r | 5 | 0 (0) | 0 (0) | 1 (1) | 2 (2) |
| Area_47s | 4 | 0 (0) | 0 (0) | 0 (0) | 1 (1) |
| Area_IFSa | 4 | 0 (0) | 1 (1) | 0 (0) | 4 (3) |
| Area_posterior_24 | 2 | 0 (0) | 1 (1) | 1 (1) | 5 (2) |
| Area_11l | 4 | 0 (0) | 3 (2) | 0 (0) | 4 (4) |
| Area_TF | 4 | 0 (0) | 4 (2) | 1 (1) | 1 (1) |
| Area_anterior_47r | 4 | 0 (0) | 2 (1) | 0 (0) | 0 (0) |
| Thal_Ventral_Lateral_Anterior | 2 | 0 (0) | 1 (1) | 1 (1) | 2 (1) |
| Ventral_Visual_Complex | 2 | 0 (0) | 4 (2) | 0 (0) | 1 (1) |
| Area_anterior_32_prime | 3 | 0 (0) | 1 (1) | 0 (0) | 3 (2) |
| Area_33_prime | 3 | 0 (0) | 2 (2) | 0 (0) | 1 (1) |
| Area_Frontal_Opercular_5 | 5 | 0 (0) | 0 (0) | 0 (0) | 1 (1) |
| Frontal_Eye_Fields | 1 | 0 (0) | 0 (0) | 1 (1) | 4 (1) |
| Rostral_Area_6 | 2 | 0 (0) | 1 (1) | 0 (0) | 1 (1) |
| Area_STSd_anterior | 4 | 0 (0) | 1 (1) | 0 (0) | 0 (0) |
| Area_8Ad | 3 | 0 (0) | 0 (0) | 0 (0) | 0 (0) |
| Area_TemporoParietoOccipital_Junction_1 | 1 | 0 (0) | 1 (1) | 0 (0) | 0 (0) |
| Area_posterior_10p | 3 | 0 (0) | 0 (0) | 0 (0) | 0 (0) |
| Area_s32 | 3 | 0 (0) | 0 (0) | 0 (0) | 1 (1) |
| Caudate | 4 | 0 (0) | 1 (1) | 0 (0) | 0 (0) |
| Frontal_Opercular_Area_2 | 2 | 0 (0) | 0 (0) | 1 (1) | 1 (1) |
| ParaHippocampal_Area_2 | 3 | 0 (0) | 1 (1) | 0 (0) | 3 (2) |
| Perirhinal_Ectorhinal_Cortex | 2 | 0 (0) | 0 (0) | 0 (0) | 0 (0) |
| Anterior_24_prime | 3 | 0 (0) | 0 (0) | 0 (0) | 0 (0) |
| Area_47l_(47_lateral) | 3 | 0 (0) | 0 (0) | 0 (0) | 0 (0) |
| Area_Posterior_Insular_1 | 4 | 0 (0) | 1 (1) | 0 (0) | 2 (2) |
| Area_anterior_9-46v | 3 | 0 (0) | 0 (0) | 0 (0) | 0 (0) |
| Area_p32_prime | 2 | 0 (0) | 0 (0) | 0 (0) | 0 (0) |
| PreSubiculum | 4 | 0 (0) | 1 (1) | 1 (1) | 1 (1) |
| Ventral_Area_24d | 1 | 0 (0) | 0 (0) | 0 (0) | 1 (1) |
| Area_6_anterior | 1 | 1 (1) | 1 (1) | 1 (1) | 3 (1) |
| Parieto-Occipital_Sulcus_Area_1 | 1 | 0 (0) | 3 (1) | 0 (0) | 0 (0) |
| Thal_Ventral_Lateral_Posterior | 1 | 0 (0) | 0 (0) | 0 (0) | 1 (1) |
| Area_8BM | 2 | 0 (0) | 0 (0) | 0 (0) | 0 (0) |
| Area_Posterior_24_prime | 2 | 0 (0) | 0 (0) | 0 (0) | 1 (1) |
| Area_TE1_Middle | 2 | 0 (0) | 0 (0) | 0 (0) | 0 (0) |
| ParaHippocampal_Area_3 | 2 | 0 (0) | 0 (0) | 2 (1) | 2 (1) |
| Pirform_Cortex | 2 | 0 (0) | 1 (1) | 0 (0) | 1 (1) |
| Primary_Sensory_Cortex | 1 | 0 (0) | 0 (0) | 0 (0) | 0 (0) |
| Area_9_Middle | 2 | 0 (0) | 0 (0) | 0 (0) | 0 (0) |
| Area_9_anterior | 2 | 0 (0) | 0 (0) | 0 (0) | 0 (0) |
| Area_p32 | 2 | 0 (0) | 0 (0) | 0 (0) | 0 (0) |
| Auditory_5_Complex | 2 | 0 (0) | 0 (0) | 0 (0) | 0 (0) |
| Superior_Temporal_Visual_Area | 1 | 0 (0) | 0 (0) | 0 (0) | 0 (0) |
| Thal_Mediodorsomedial_magnocellular | 2 | 1 (1) | 1 (1) | 1 (1) | 3 (2) |
| Anterior_Agranular_Insula_Complex | 1 | 0 (0) | 0 (0) | 0 (0) | 0 (0) |
| Area_3a | 1 | 0 (0) | 0 (0) | 0 (0) | 0 (0) |
| Area_45 | 1 | 0 (0) | 0 (0) | 0 (0) | 0 (0) |
| Area_5m | 1 | 0 (0) | 0 (0) | 1 (1) | 1 (1) |
| Area_8B_Lateral | 2 | 0 (0) | 0 (0) | 0 (0) | 0 (0) |
| Area_8C | 1 | 0 (0) | 0 (0) | 0 (0) | 0 (0) |
| Area_9_Posterior | 1 | 0 (0) | 0 (0) | 0 (0) | 0 (0) |
| Area_OP2-3-VS | 1 | 0 (0) | 0 (0) | 0 (0) | 0 (0) |
| Area_posterior_9-46v | 2 | 0 (0) | 0 (0) | 0 (0) | 0 (0) |
| Area_ventral_23_a+b | 1 | 0 (0) | 3 (1) | 1 (1) | 1 (1) |
| Entorhinal_Cortex | 1 | 0 (0) | 0 (0) | 0 (0) | 0 (0) |
| Fusiform_Face_Complex | 2 | 0 (0) | 0 (0) | 0 (0) | 0 (0) |
| Orbital_Frontal_Complex | 2 | 0 (0) | 0 (0) | 0 (0) | 0 (0) |
| Posterior_Insular_Area_2 | 1 | 0 (0) | 0 (0) | 0 (0) | 0 (0) |
| RetroSplenial_Complex | 1 | 0 (0) | 1 (1) | 0 (0) | 1 (1) |
| Thal_AnteroventralNucleus | 1 | 0 (0) | 0 (0) | 0 (0) | 0 (0) |
| Thal_Pulvinar_medial | 1 | 0 (0) | 0 (0) | 0 (0) | 0 (0) |
|  | 1 | 0 (0) | 1 (1) | 0 (0) | 0 (0) |
| Area_23c | 1 | 0 (0) | 0 (0) | 0 (0) | 0 (0) |
| Area_8Av | 1 | 0 (0) | 0 (0) | 0 (0) | 1 (1) |
| Area_OP4-PV | 1 | 0 (0) | 0 (0) | 0 (0) | 0 (0) |
| Area_PH | 1 | 0 (0) | 0 (0) | 0 (0) | 0 (0) |
| Area_TemporoParietoOccipital_Junction_3 | 1 | 0 (0) | 0 (0) | 0 (0) | 0 (0) |
| Dorsal_Area_24d | 1 | 0 (0) | 0 (0) | 0 (0) | 0 (0) |
| Frontal_Opercular_Area_3 | 2 | 1 (1) | 0 (0) | 1 (1) | 0 (0) |
| Frontal_Opercular_Area_4 | 1 | 0 (0) | 1 (1) | 0 (0) | 0 (0) |
| Insular_Granular_Complex | 1 | 0 (0) | 0 (0) | 0 (0) | 0 (0) |
| Medial_Belt_Complex | 1 | 0 (0) | 1 (1) | 0 (0) | 0 (0) |
| Medial_Superior_Temporal_Area | 1 | 0 (0) | 0 (0) | 0 (0) | 0 (0) |
| Middle_Insular_Area | 1 | 1 (1) | 2 (1) | 0 (0) | 0 (0) |
| Nucleus_Accumbens | 1 | 0 (0) | 2 (1) | 0 (0) | 0 (0) |
| Para-Insular_Area | 2 | 0 (0) | 0 (0) | 0 (0) | 1 (1) |
| Primary_Auditory_Cortex | 1 | 0 (0) | 0 (0) | 0 (0) | 0 (0) |
| Primary_Motor_Cortex | 1 | 0 (0) | 0 (0) | 0 (0) | 0 (0) |
| Primary_Visual_Cortex | 1 | 0 (0) | 0 (0) | 0 (0) | 0 (0) |
| Supplementary_and_Cingulate_Eye_Field | 1 | 0 (0) | 0 (0) | 0 (0) | 0 (0) |
| Thal_Centralmedian | 1 | 0 (0) | 0 (0) | 0 (0) | 2 (1) |
| Thal_Ventral_posterolateral | 1 | 0 (0) | 0 (0) | 0 (0) | 0 (0) |
| VentroMedial_Visual_Area_1 | 1 | 0 (0) | 0 (0) | 0 (1) | 0 (0) |
| Area_10v | 1 | 0 (0) | 0 (0) | 0 (0) | 0 (0) |
| Area_25 | 1 | 0 (0) | 0 (0) | 0 (0) | 0 (0) |
| Area_31a | 1 | 0 (0) | 0 (0) | 0 (0) | 1 (1) |
| Area_31p_ventral | 1 | 0 (0) | 0 (0) | 0 (0) | 0 (0) |
| Area_52 | 1 | 0 (0) | 0 (0) | 0 (0) | 0 (0) |
| Area_PFm_Complex | 1 | 0 (0) | 0 (0) | 0 (0) | 0 (0) |
| Area_PHT | 1 | 0 (0) | 0 (0) | 0 (0) | 0 (0) |
| Area_TG_Ventral | 1 | 0 (0) | 1 (1) | 0 (0) | 0 (0) |
| Area_TemporoParietoOccipital_Junction_2 | 1 | 0 (0) | 0 (0) | 0 (0) | 0 (0) |
| Area_anterior_10p | 1 | 0 (0) | 0 (0) | 0 (0) | 0 (0) |
| Area_dorsal_23_a+b | 1 | 0 (0) | 0 (0) | 0 (0) | 0 (0) |
| Dorsal_Transitional_Visual_Area | 1 | 0 (0) | 0 (0) | 0 (0) | 0 (0) |
| Globus_pallidus_externalis | 1 | 0 (0) | 1 (1) | 0 (0) | 1 (1) |
| Lateral_Belt_Complex | 1 | 0 (0) | 1 (1) | 0 (0) | 0 (0) |
| ParaHippocampal_Area_1 | 1 | 0 (0) | 0 (0) | 0 (0) | 0 (0) |
| PeriSylvian_Language_Area | 1 | 0 (0) | 0 (0) | 0 (0) | 0 (0) |
| Second_Visual_Area | 1 | 0 (0) | 1 (1) | 0 (0) | 0 (0) |
| Thal_Ventral_Anterior | 1 | 0 (0) | 0 (0) | 0 (0) | 1 (1) |
