# Supplementary material
Source: Research Square preprint supplement (doi:10.21203/rs.3.rs-9107770/v1)
Supplement: Supplementary file 3 [file bd2adea8ca4b810bceb99b40.xlsx]

## Sheet: Sheet1
	1	2	3	4	5	6	7	8	9	10	11	12	score	# correct	questions answered	notes
key	B	A	D	C	B	B	D	A	C	D	A	C
accuracy	0.8	0.55	0.4	0.736842	0.894737	0.421053	0.7	0.578947	0.75	0.4	0.8	0.85
key (version A)	A	B	D	C	B	B	D	A	C	D	A	C
EM1103	B	D	C	C	B	A	D	C	C	B	A	C	58.3333	7	12
EM1118	B	B	D	C	B	C	C	C	D	D	A	C	58.3333	7	12
EM1118-ses2*	B	B	D	C	B	C	C	C	D	D	A	C	58.3333	7	12	smell test was not repeated for second run
EM1122	B	A	C	C	B	A	D	A	B	A	A	D	58.3333	7	12
EM1103-2*	B	D	C	C	B	A	D	C	C	B	A	C	58.3333	7	12	smell test was not repeated for second run
EM1125	B	A	C	D	B	D	D	A	C	A	A	C	66.6667	8	12
EM1126	B	A	C				D	A	C	C	B	C	66.6667	6	9
EM1127	A	B	D	C	B	A	D	A	C	D	A	C	75	9	12
EM1128	B	B	C	C	B	B	D	A	C	D	A	C	83.3333	10	12
EM1168	D	A	D	D	B	B	A	C	A	B	A	C	50	6	12
EM1169	B	A	D	C	B	B	D	A	C	D	B	C	91.6667	11	12
EM1175	A	D	C	A	C	C	A	B	C	C	C	B	8.33333	1	12
EM1184	B	D	D	C	B	C	D	A	C	C	A	C	75	9	12
EM1185	B	B	C	C	B	B	C	A	C	D	A	C	75	9	12
EM1186	B	A	C	D	A	B	D	D	C	A	A	C	58.3333	7	12
EM1188	A	A	D	C	B	B	D	A	C	C	A	C	83.3333	10	12
EM1201	B	A	D	C	B	B	D	A	C	D	A	C	100	12	12
EM1202	B	A	B	C	B	A	D	C	C	A	A	C	66.6667	8	12
EM1219*	B	A	C	D	B	D	C		A	B	D	B	27.2727	3	11	version A
EM1220	B	A	C	C	B	B	D	A	C	D	A	C	91.6667	11	12
EM1221
