# Supplementary material
Source: Research Square preprint supplement (doi:10.21203/rs.3.rs-9107770/v1)
Supplement: Supplementary file 5 [file fb8e130aea5c66341709353e.xlsx]

## Sheet: Sheet1
subject	age	sex	smell test questions correct	smell test questions answered
EM1103	34	F	7	12
EM1103-2
EM1118	37	M	7	12
EM1118-ses2
EM1122	30	M	7	12
EM1125	30	F	8	12
EM1126	17	F	6	9
EM1127	60	M	9	12
EM1128	25	M	10	12
EM1168	54	M	6	12
EM1169	22	F	11	12
EM1175	29	F	1	12
EM1184	23	M	9	12
EM1185	37	M	9	12
EM1186	66	M	7	12
EM1188	28	M	10	12
EM1201	57	F	12	12
EM1202	55	M	8	12
EM1219	53	F	3	11
EM1220	18	F	11	12
EM1221	25	M
